# Supplementary material for: Role of Feed Forward Neural Networks Coupled with Genetic Algorithm in Capitalizing of Intracellular Alpha-Galactosidase Production byAcinetobactersp.
Source: Hindawi journal article supplement (doi:10.1155/2014/361732), 2014-01-01

## Supporting document for identification of *Acinetobacter* sp CBT01

### Morphological and Biochemical Characterization:

The colony morphology of the isolate was observed to be circular with entire margins and opaque. The isolate is a gram-negative bacteria with short rods (cocobacilli) of 1-2µm in size (figure 1). The morphological and biochemical characteristics of isolate are given in the Table 1 and 2

**Table 1: Morphological and physiological characteristics of isolate**

| Tests                                | Results    |
|--------------------------------------|------------|
| <b>Colony morphology</b>             |            |
| Configuration                        | Circular   |
| Margin                               | Entire     |
| Elevation                            | Convex     |
| Surface                              | Smooth     |
| Pigment                              | Off-white  |
| Opacity                              | Opaque     |
| Gram's reaction                      | negative   |
| Cell shape                           | Rods       |
| Size (µm)                            | 1-2µm      |
| Spore(s)                             | -          |
| Motility                             | Non-motile |
| <b>Physiological characteristics</b> |            |
| <b>Growth at temperatures</b>        |            |
| 4°C                                  | -          |
| 10°C                                 | +          |
| 25°C                                 | +          |

|                     |   |
|---------------------|---|
| 30°C                | + |
| 37°C                | + |
| 42°C                | + |
| 55°C                | + |
| <b>Growth at pH</b> |   |
| pH 4.0              | - |
| pH 5.0              | + |
| pH 6.0              | + |
| pH 7.0              | + |
| pH 8.0              | + |
| pH 9.0              | + |
| pH 10.0             | + |
| pH 11.0             | + |

**Table 2: Biochemical Characteristics of isolate**

| Substrate, Test      | Result   |
|----------------------|----------|
| Gram Staining        | Negative |
| Citrate              | Positive |
| Catalase             | Positive |
| Gelatin liquefaction | Negative |
| Nitrate reduction    | Negative |
| Oxidase              | Negative |
| Acid production from |          |
| Glucose              | Positive |
| Sucrose              | Positive |
| Mannose              | Positive |
| Lactose              | Negative |
| Indole               | Negative |
| Methyl red           | Positive |
| Voges-Proskauer      | Negative |

**Figure 1 Scanning electron microscope of isolate at magnification of 10x.**

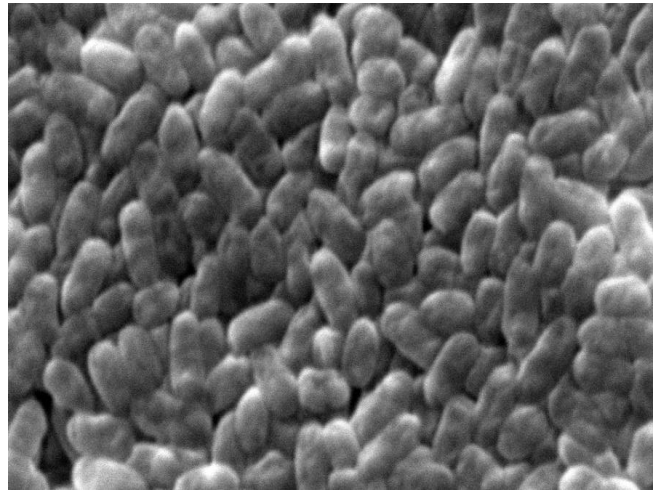

Supplement: f1 [file 361732.f1.pdf]
